# Supplementary material for: Nitrogen Acquisition Strategies Mediated by Insect Symbionts: A Review of Their Mechanisms, Methodologies, and Case Studies
Source: MDPI journal article supplement (doi:10.3390/insects13010084), 2022-01-12
Supplement: s1 [file s1]

**Table S1.** Evidence for the NWR pattern employed by some insects for nitrogen provisioning.

| <b>Insect</b>                                                  | <b>Nutritional supplies</b> | <b>developmental Stage</b> | <b>Functional bacteria</b>     | <b>Bacteria Location</b>    | <b>Nitrogenous waste</b> | <b>Methods</b>            | <b>Reference</b> |
|----------------------------------------------------------------|-----------------------------|----------------------------|--------------------------------|-----------------------------|--------------------------|---------------------------|------------------|
| Blattaria:<br>Cryptocercidae-<br><i>Periplaneta americana</i>  | Omnivorous                  | Adult                      | <i>Blattabacterium cuenoti</i> | Fat body<br>(Intracellular) | Ammonia,<br>urea         | Genomic analysis          | [1, 2]           |
| Blattaria:<br>Cryptocercidae-<br><i>Periplaneta fuliginosa</i> | Omnivorous                  | Adult                      | <i>Blattabacterium</i> spp.    | Fat body<br>(Intracellular) | Ammonia,<br>urea         | Genomic analysis          | [3]              |
| Blattaria:<br>Cryptocercidae-<br><i>Periplaneta japonica</i>   | Omnivorous                  | Adult                      | <i>Blattabacterium</i> spp.    | Fat body<br>(Intracellular) | Ammonia,<br>urea         | Genomic analysis          | [3]              |
| Blattaria:<br>Blattellidae-<br><i>Blattella germanica</i>      | Omnivorous                  | Adult                      | <i>Blattabacterium cuenoti</i> | Fat body<br>(Intracellular) | Ammonia,<br>urea         | Transcriptome<br>analysis | [4]              |
| Blattaria:<br>Mastotermitidae-<br><i>Mastotermes</i>           | Xylophagous                 | Adult                      | <i>Blattabacterium cuenoti</i> | Fat body;<br>Hindgut        | Ammonia,<br>urea         | Genomic analysis          | [5, 6]           |

|                                                                                                                                                |             |       |                                                                                                |         |                  |                                                                                                            |        |
|------------------------------------------------------------------------------------------------------------------------------------------------|-------------|-------|------------------------------------------------------------------------------------------------|---------|------------------|------------------------------------------------------------------------------------------------------------|--------|
| <i>darwinienensis</i>                                                                                                                          |             |       |                                                                                                |         |                  |                                                                                                            |        |
| Blattaria:<br>Rhinotermitidae-<br><i>Reticulitermes</i><br><i>flavipes</i>                                                                     | Xylophagous | Adult | <i>Streptococcus</i> sp.;<br><i>Bacteroides</i> ;<br><i>Termitidis</i> ;<br><i>Citrobacter</i> | Hindgut | Uric acid        | Assimilation:<br><br><sup>15</sup> N-labeled uric<br><br>acid; Biochemical<br><br>tests (Enzyme<br>assays) | [7, 8] |
| Blattaria:<br>Rhinotermitidae-<br><i>Coptotermes</i><br><i>formosanus</i>                                                                      | Xylophagous | Adult | Bacteroidales                                                                                  | Gut     | Ammonia,<br>urea | Genomic analysis                                                                                           | [9]    |
| Other<br>wood-feeding<br>termites (i.e.<br><i>Reticulitermes</i><br><br><i>speratus</i> ,<br><br><i>Coptotermes</i><br><br><i>formosanus</i> , | Xylophagous | Adult | <i>Clostridia</i> ;<br>Enterobacteriaceae;<br>Low G+C<br>Gram-positive cocci                   | Gut     | Uric acid        | Uric acid-degrading<br>bacteria isolation                                                                  | [10]   |

|                                                                                                                                                                                                                                                                                |        |              |                                            |     |           |                                      |      |
|--------------------------------------------------------------------------------------------------------------------------------------------------------------------------------------------------------------------------------------------------------------------------------|--------|--------------|--------------------------------------------|-----|-----------|--------------------------------------|------|
| <i>Neotermes</i><br><i>koshunensis</i> ,<br><i>Glyptotermes</i><br><i>fuscus</i> ,<br><i>Cryptotermes</i><br><i>domesticus</i> ,<br><i>Hodotermopsis</i><br><i>sjoestedti</i> ,<br><i>Odontotermes</i><br><i>formosanus</i> ,<br><i>Nasutitermes</i><br><i>takasagoensis</i> ) |        |              |                                            |     |           |                                      |      |
| Coleoptera:<br>Curculionidae-                                                                                                                                                                                                                                                  | Phloem | Adult; larva | <i>Serratia</i><br><i>proteomaculans</i> ; | Gut | Uric acid | Biochemical tests<br>(Enzyme assays) | [11] |

|                                                                 |                |              |                                                                                                |                       |           |                                                                                      |      |
|-----------------------------------------------------------------|----------------|--------------|------------------------------------------------------------------------------------------------|-----------------------|-----------|--------------------------------------------------------------------------------------|------|
| <i>Dendroctonus rhizophagus</i>                                 |                |              | <i>Rahnella aquatilis</i>                                                                      |                       |           |                                                                                      |      |
| Coleoptera:<br>Curculionidae-<br><i>Dendroctonus valens</i>     | Phloem         | Adult; larva | <i>Pseudomonas fluorescens</i> ; <i>Serratia proteomaculans</i> ;<br><i>Rahnella aquatilis</i> | Gut                   | Uric acid | Biochemical tests<br>(Enzyme assays)                                                 | [11] |
| Coleoptera:<br>Cerambycidae-<br><i>Anoplophora glabripennis</i> | Xylophagous    | Larva; egg   | Enterobacteriaceae                                                                             | Gut                   | Urea      | Assimilation: <sup>15</sup> N-<br>labeled urea;<br>Culture-independent<br>approaches | [12] |
| Coleoptera:<br>Scarabaeidae-<br><i>Melolontha hippocastani</i>  | Root or leaf   | Adult; larva | <i>Burkholderia</i> ;<br><i>Parabacteroides</i>                                                | Gut                   | Urea      | Metagenome<br>analysis;<br>Assimilation: <sup>15</sup> N-<br>labeled urea            | [13] |
| Diptera:<br>Stratiomyidae-<br><i>Hermetia illucens</i>          | Organic waste  | Larva        | No highlight<br>bacteria                                                                       | Presumption<br>in gut | Ammonia   | Calculated biomass<br>conversion ratio                                               | [14] |
| Diptera:<br>Tephritidae-<br><i>Bactrocera oleae</i>             | Polyphagous    | Adult female | <i>Candidatus</i> Erwinia<br>dacicola                                                          | Gut                   | Urea      | Monitored female<br>fecundity                                                        | [15] |
| Diptera:<br>Tephritidae-<br><i>Anastrepha ludens</i>            | Polyphagous    | Adult        | <i>Enterobacter agglomerans</i>                                                                | Gut                   | Uric acid | Attraction assays                                                                    | [16] |
| Diptera:                                                        | Rosaceae fruit | Adult        | <i>Enterobacter</i>                                                                            | Gut                   | Uric acid | Attraction assays                                                                    | [17] |

|                                                                       |                                                                |                       |                                                                                                                |                           |           |                                                                    |          |
|-----------------------------------------------------------------------|----------------------------------------------------------------|-----------------------|----------------------------------------------------------------------------------------------------------------|---------------------------|-----------|--------------------------------------------------------------------|----------|
| Tephritidae-<br><i>Rhagoletis pomonella</i>                           |                                                                |                       | <i>agglomerans</i>                                                                                             |                           |           |                                                                    |          |
| Diptera:<br>Drosophilidae-<br><i>Drosophila melanogaster/ suzukii</i> | Polyphagous                                                    | Adult                 | <i>Acetobacter</i>                                                                                             | Gut                       | Uric acid | Genomic analysis;<br>Biochemical tests<br>(Enzyme assays)          | [18]     |
| Hemiptera:<br>Aphididae-<br><i>Acyrtosiphon pisum</i>                 | Phloem sap                                                     | Larva                 | <i>Buchnera</i>                                                                                                | Bacteriocytes             | Ammonia   | Metabolite profile<br>analysis                                     | [19, 20] |
| Hemiptera:<br>Parastrachiidae-<br><i>Parastrachia japonensis</i>      | Monophagous<br>(The drupes<br>of <i>Shoepfia jasminodora</i> ) | Nymph; adult          | <i>Erwinia</i> -like bacteria                                                                                  | In the cecum<br>of midgut | Uric acid | Biochemical tests<br>(Enzyme assays)                               | [21]     |
| Hemiptera:<br>Delphacidae-<br><i>Nilaparvata lugens</i>               | Monophagous<br>(Rice sap)                                      | Adult                 | Yeast-like<br>symbionts                                                                                        | Intracellular             | Uric acid | Biochemical tests<br>(Enzyme assays);                              | [22, 23] |
| Hemiptera:<br>Dactylopiidae-<br><i>Dactylopius coccus</i>             | Cactus sap                                                     | Adult; egg;<br>embryo | <i>Candidatus</i><br>Dactylopiibacterium<br>carminicum;<br>Uricolytic fungal:<br>Rhodotorula,<br>Cryptococcus, | Ovary;gut;<br>egg surface | Uric acid | Genomic analysis;<br>Biochemical tests<br>(Enzyme assays);<br>FISH | [24, 25] |

|                                                                       |             |                            |                                                                                                                                                             |                                        |                    |                                                                                                                                                            |          |
|-----------------------------------------------------------------------|-------------|----------------------------|-------------------------------------------------------------------------------------------------------------------------------------------------------------|----------------------------------------|--------------------|------------------------------------------------------------------------------------------------------------------------------------------------------------|----------|
|                                                                       |             |                            | Trametes,<br>Penicillium,<br>Debaryomyces                                                                                                                   |                                        |                    |                                                                                                                                                            |          |
| Hemiptera:<br>Dactylopiidae-<br><i>Dactylopius</i><br><i>opuntiae</i> | Cactus sap  | Adult; egg;<br>embryo      | <i>Candidatus</i><br>Dactylopiibacterium<br>carminicum;<br>Uricolytic fungal:<br>Rhodotorula,<br>Cryptococcus,<br>Trametes,<br>Penicillium,<br>Debaryomyces | Ovary;gut;<br>egg surface              | Uric acid          | Genomic analysis;<br>Biochemical tests<br>(Enzyme assays);<br>FISH                                                                                         | [24, 25] |
| Hymenoptera:<br>Formicidae-<br><i>Camponotus</i><br><i>floridanus</i> | Omnivorous  | Adult; Larva;<br>pupa; egg | <i>Blochmannia</i><br><i>floridanus</i>                                                                                                                     | Bacteriocytes<br>in midgut or<br>ovary | Urea               | Functional genes<br>identification ( <i>ureC</i> ,<br><i>ureF</i> , <i>glnA</i> , and <i>speB</i> );<br><br>Assimilation: <sup>15</sup> N-<br>labeled urea | [26, 27] |
| Hymenoptera:<br>Formicidae-<br><i>Camponotus</i><br><i>compmsus</i>   | Omnivorous  | Adult                      | No highlight<br>bacteria                                                                                                                                    | Gut                                    | Urea               | Selection behaviors<br>test                                                                                                                                | [28]     |
| Hymenoptera:<br>Formicidae-<br><i>Cephalotes varians</i>              | Herbivorous | Adult                      | Burkholderiales;<br>Opitutales;<br>Rhizobiales                                                                                                              | Gut                                    | Urea, Uric<br>acid | Metagenome<br>analysis;<br><br>Assimilation: <sup>15</sup> N-                                                                                              | [29]     |

|                                                                                                                                                                                                                                                                                                                                                                                                                                                                                                                                                                                       |                   |       |                                                |        |                    |                        |          |
|---------------------------------------------------------------------------------------------------------------------------------------------------------------------------------------------------------------------------------------------------------------------------------------------------------------------------------------------------------------------------------------------------------------------------------------------------------------------------------------------------------------------------------------------------------------------------------------|-------------------|-------|------------------------------------------------|--------|--------------------|------------------------|----------|
|                                                                                                                                                                                                                                                                                                                                                                                                                                                                                                                                                                                       |                   |       |                                                |        |                    | labeled urea           |          |
| Hymenoptera:<br>Formicidae-<br><i>Cephalotes</i><br>species (i.e.<br><i>Cephalotes</i><br><i>angustus</i> , <i>C.</i><br><i>atratus</i> , <i>C.</i><br><i>clypeatus</i> , <i>C.</i><br><i>eduarduli</i> , <i>C.</i><br><i>grandinosus</i> , <i>C.</i><br><i>maculatus</i> , <i>C.</i><br><i>minutus</i> , <i>C.</i><br><i>pallens</i> , <i>C. pellans</i> ,<br><i>C. persimilis</i> , <i>C.</i><br><i>pusillus</i> , <i>C.</i><br><i>rohweri</i> , <i>C.</i><br><i>similimus</i> , <i>C.</i><br><i>spinosus</i> , <i>C.</i><br><i>umbraculatus</i> , <i>C.</i><br><i>persimplex</i> ) | Herbivorous       | Adult | Burkholderiales;<br>Opitutales;<br>Rhizobiales | Gut    | Urea, Uric<br>acid | Metagenome<br>analysis | [29]     |
| Hymenoptera:<br>Formicidae-<br><i>Dolichoderus</i><br>species                                                                                                                                                                                                                                                                                                                                                                                                                                                                                                                         | Plant<br>exudates | Adult | Bartonellaceae                                 | Midgut | Urea, uric<br>acid | Genomic analysis       | [30, 31] |

1. Sabree, Z.L.; Kambhampati, S.; Moran, N.A. Nitrogen Recycling and Nutritional Provisioning by *Blattabacterium*, the Cockroach Endosymbiont. *P Natl Acad Sci USA* **2009**, *106*, 19521-19526, doi:10.1073/pnas.0907504106.
2. Mullins, D.E.; Cochran, D.G. Nitrogen-Metabolism in American Cockroach .1. An Examination of Positive Nitrogen-Balance with Respect to Uric-Acid Stores. *Comp Biochem Physiol* **1975**, *50*, 489-500, doi:10.1016/0300-9629(75)90306-0.
3. Vicente, C.S.L.; Mondal, S.I.; Akter, A.; Ozawa, S.; Kikuchi, T.; Hasegawa, K. Genome Analysis of New *Blattabacterium* Spp., Obligatory Endosymbionts of *Periplaneta Fuliginosa* and *P. Japonica*. *Plos One* **2018**, *13*, e0200512:1-e0200512:14, doi: 10.1371/journal.pone.0200512.
4. Patino-Navarrete, R.; Piulachs, M.D.; Belles, X.; Moya, A.; Latorre, A.; Pereto, J. The Cockroach *Blattella Germanica* Obtains Nitrogen from Uric Acid through a Metabolic Pathway Shared with Its Bacterial Endosymbiont. *Biol Letters* **2014**, *10*, doi:10.1098/rsbl.2014.0407.
5. Sabree, Z.L.; Huang, C.Y.; Arakawa, G.; Tokuda, G.; Lo, N.; Watanabe, H.; Moran, N.A. Genome Shrinkage and Loss of Nutrient-Providing Potential in the Obligate Symbiont of the Primitive Termite *Mastotermes Darwiniensis*. *Appl Environ Microb* **2012**, *78*, 204-210, doi:10.1128/Aem.06540-11.
6. Kinjo, Y.; Bourguignon, T.; Tong, K.J.; Kuwahara, H.; Lim, S.J.; Yoon, K.B.; Shigenobu, S.; Park, Y.C.; Nalepa, C.A.; Hongoh, Y.; etc. Parallel and Gradual Genome Erosion in the *Blattabacterium* Endosymbionts of *Mastotermes Darwiniensis* and *Cryptocercus* Wood Roaches. *Genome Biol Evol* **2018**, *10*, 1622-1630, doi:10.1093/gbe/evy110.
7. Potrikus, C.J.; Breznak, J.A. Gut Bacteria Recycle Uric-Acid Nitrogen in Termites - a Strategy for Nutrient Conservation. *P Natl Acad Sci-Biol* **1981**, *78*, 4601-4605, doi:10.1073/pnas.78.7.4601.
8. Potrikus, C. J.; Breznak, J. A. Uric Acid- Degrading Bacteria in Guts of Termites [*Reticulitermes Flavipes* (Kollar)]. *Appl Environ Microb* **1980**, *40*, 117-124, doi:10.1128/Aem.40.1.117-124.1980.
9. Hongoh, Y.; Sharma, V.K.; Prakash, T.; Noda, S.; Toh, H.; Taylor, T.D.; Kudo, T.; Sakaki, Y.; Toyoda, A.; Hattori, M.; etc. Genome of an Endosymbiont Coupling N<sub>2</sub> Fixation to Cellulolysis within Protist Cells in Termite Gut. *Science* **2008**, *322*, 1108-1109, doi:10.1126/science.1165578.
10. Thong-On, A.; Suzuki, K.; Noda, S.; Inoue, J.; Kajiwar, S.; Ohkuma, M. Isolation and Characterization of Anaerobic Bacteria for Symbiotic Recycling of Uric Acid Nitrogen in the Gut of Various Termites. *Microbes Environ* **2012**, *27*, 186-192, doi:10.1264/jsme2.ME11325.
11. Morales-Jimenez, J.; de Leon, A.V.P.; Garcia-Dominguez, A.; Martinez-Romero, E.; Zuniga, G.; Hernandez-Rodriguez, C. Nitrogen-Fixing and Uricolytic Bacteria Associated with the Gut of *Dendroctonus Rhizophagus* and *Dendroctonus Valens* (Curculionidae:



Scolytinae). *Microb Ecol* **2013**, 66, 200-210, doi:10.1007/s00248-013-0206-3.

12. Ayayee, P.; Rosa, C.; Ferry, J.G.; Felton, G.; Saunders, M.; Hoover, K. Gut Microbes Contribute to Nitrogen Provisioning in a Wood-Feeding Cerambycid. *Environ Entomol* **2014**, 43, 903-912, doi:10.1603/En14045.
13. Alonso-Pernas, P.; Bartram, S.; Arias-Cordero, E.M.; Novoselov, A.L.; Halty-deLeon, L.; Shao, Y.Q.; Boland, W. In Vivo Isotopic Labeling of Symbiotic Bacteria Involved in Cellulose Degradation and Nitrogen Recycling within the Gut of the Forest Cockchafer (*Melolontha Hippocastani*). *Front Microbiol* **2018**, 9, 488:1-488:15, doi:10.3389/fmicb.2018.00488.
14. Isibika, A.; Vinneras, B.; Kibazohi, O.; Zurbrugg, C.; Lalander, C. Pre-Treatment of Banana Peel to Improve Composting by Black Soldier Fly (*Hermetia Illucens* (L.), Diptera: Stratiomyidae) Larvae. *Waste Manage* **2019**, 100, 151-160, doi:10.1016/j.wasman.2019.09.017.
15. Ben-Yosef, M.; Pasternak, Z.; Jurkevitch, E.; Yuval, B. Symbiotic Bacteria Enable Olive Flies (*Bactrocera Oleae*) to Exploit Intractable Sources of Nitrogen. *J Evolution Biol* **2014**, 27, 2695-2705, doi:10.1111/jeb.12527.
16. Robacker, D.C.; Lauzon, C.R. Purine Metabolizing Capability of *Enterobacter Agglomerans* Affects Volatiles Production and Attractiveness to Mexican Fruit Fly. *J Chem Ecol* **2002**, 28, 1549-1563, doi:10.1023/A:1019920328062.
17. Lauzon, C.R.; Sjogren, R.E.; Prokopy, R.J. Enzymatic Capabilities of Bacteria Associated with Apple Maggot Flies: A Postulated Role in Attraction. *J Chem Ecol* **2000**, 26, 953-967, doi:10.1023/A:1005460225664.
18. Winans, N.J.; Walter, A.; Chouaia, B.; Chaston, J.M.; Douglas, A.E.; Newell, P.D. A Genomic Investigation of Ecological Differentiation between Free-Living and Drosophila-Associated Bacteria. *Mol Ecol* **2017**, 26, 4536-4550, doi:10.1111/mec.14232.
19. Macdonald, S.J.; Lin, G.G.; Russell, C.W.; Thomas, G.H.; Douglas, A.E. The Central Role of the Host Cell in Symbiotic Nitrogen Metabolism. *P Roy Soc B-Biol Sci* **2012**, 279, 2965-2973, doi:10.1098/rspb.2012.0414.
20. Hansen, A.K.; Moran, N.A. Aphid Genome Expression Reveals Host-Symbiont Cooperation in the Production of Amino Acids. *P Natl Acad Sci USA* **2011**, 108, 2849-2854, doi:10.1073/pnas.1013465108.
21. Kashima, T.; Nakamura, T.; Tojo, S. Uric Acid Recycling in the Shield Bug, *Parastrachia Japonensis* (Hemiptera : Parastrachiidae), During Diapause. *J Insect Physiol* **2006**, 52, 816-825, doi:10.1016/j.jinsphys.2006.05.003.
22. Hongoh, Y.; Sasaki, T.; Ishikawa, H. Cloning, Sequence Analysis and Expression in *Escherichia Coli* of the Gene Encoding a Uricase from the Yeast-Like Symbiont of the Brown Planthopper, *Nilaparvata Lugens*. *Insect Biochem Molec* **2000**, 30, 173-182, doi:10.1016/S0965-1748(99)00116-2.
23. Xue, J.; Zhou, X.; Zhang, C.X.; Yu, L.L.; Fan, H.W.; Wang, Z.; Xu, H.J.; Xi, Y.; Zhu, Z.R.; Zhou, W.W.; etc. Genomes of the Rice Pest

Brown Planthopper and Its Endosymbionts Reveal Complex Complementary Contributions for Host Adaptation. *Genome Biol* **2014**, *15*, 521:1-521:20, doi:10.1186/s13059-014-0521-0.

24. de Leon, A.V.P.; Ormeno-Orrillo, E.; Ramirez-Puebla, S.T.; Rosenblueth, M.; Esposti, M.D.; Martinez-Romero, J.; Martinez-Romero, E. *Candidatus* Dactylopiibacterium Carminicum, a Nitrogen-Fixing Symbiont of *Dactylopius* Cochineal Insects (Hemiptera: Coccoidea: Dactylopiidae). *Genome Biol Evol* **2017**, *9*, 2237-2250, doi:10.1093/gbe/evx156.
25. de Leon, A.V.P.; Sanchez-Flores, A.; Rosenblueth, M.; Martinez-Romero, E. Fungal Community Associated with *Dactylopius* (Hemiptera: Coccoidea: Dactylopiidae) and Its Role in Uric Acid Metabolism. *Front Microbiol* **2016**, *7*, 954:1-954:15, doi:10.3389/fmicb.2016.00954.
26. Zientz, E.; Beyaert, N.; Gross, R.; Feldhaar, H. Relevance of the Endosymbiosis of *Blochmannia Floridanus* and Carpenter Ants at Different Stages of the Life Cycle of the Host. *Appl Environ Microb* **2006**, *72*, 6027-6033, doi:10.1128/Aem.00933-06.
27. Feldhaar, H.; Straka, J.; Krischke, M.; Berthold, K.; Stoll, S.; Mueller, M.J.; Gross, R. Nutritional Upgrading for Omnivorous Carpenter Ants by the Endosymbiont *Blochmannia*. *Bmc Biol* **2007**, *5*, 48:1-48:11, doi:10.1186/1741-7007-5-48.
28. Shetty, P.S. Gustatory Preferences of Ants (*Camponotus-Compressus*) for Urea and Sugars. *Experientia* **1982**, *38*, 259-260, doi:10.1007/Bf01945100.
29. Hu, Y.; Sanders, J.G.; Lukasik, P.; D'Amelio, C.L.; Millar, J.S.; Vann, D.R.; Lan, Y.M.; Newton, J.A.; Schotanus, M.; Kronauer, D.J.C.; et al. Herbivorous Turtle Ants Obtain Essential Nutrients from a Conserved Nitrogen-Recycling Gut Microbiome. *Nat Commun* **2018**, *9*, 2440:1-2440:14, doi:10.1038/s41467-018-04935-w.
30. Bisch, G.; Neuvonen, M.M.; Pierce, N.E.; Russell, J.A.; Koga, R.; Sanders, J.G.; Lukasik, P.; Andersson, S.G.E. Genome Evolution of Bartonellaceae Symbionts of Ants at the Opposite Ends of the Trophic Scale. *Genome Biol Evol* **2018**, *10*, 1687-1704, doi:10.1093/gbe/evy126.
31. Cook, S.C.; Davidson, D.W. Nutritional and Functional Biology of Exudate-Feeding Ants. *Entomol Exp Appl* **2006**, *118*, 1-10, doi:10.1111/j.1570-7458.2006.00374.x.
